# Supplementary material for: Co1−xS@CNT composite with a three-dimensional skeleton for high-performance magnesium–lithium hybrid batteries
Source: Royal Society of Chemistry journal article supplement (doi:10.1039/d3ma01089a), 2024-01-01
Supplement: d3ma01089a1.pdf [file d3ma01089a1.pdf]

## Supporting Information

### **Co<sub>1-x</sub>S@CNT composite three-dimensional skeleton for high-performance magnesium-lithium hybrid batteries**

**Changwei Shan,<sup>a</sup> Wutao Wei,<sup>a,\*</sup> Ximin Ling,<sup>a</sup> Xuyan Qin,<sup>a</sup> Zhao Liu,<sup>a</sup>  
Mingjie Song,<sup>a</sup> and Liwei Mi<sup>a,b,\*</sup>**

<sup>a</sup> Henan Key Laboratory of Functional Salt Materials, Center for Advanced Materials Research, Zhongyuan University of Technology, Zhengzhou, 450007, Henan, PR China.

E-mail: [506952644@qq.com](mailto:506952644@qq.com), [mlwzzu@163.com](mailto:mlwzzu@163.com)

<sup>b</sup> Pingdingshan University, Pingdingshan, 467000, Henan, PR China

\*Corresponding author

Email address: [506952644@qq.com](mailto:506952644@qq.com) (W. T. Wei) [mlwzzu@163.com](mailto:mlwzzu@163.com) (L. W. Mi)

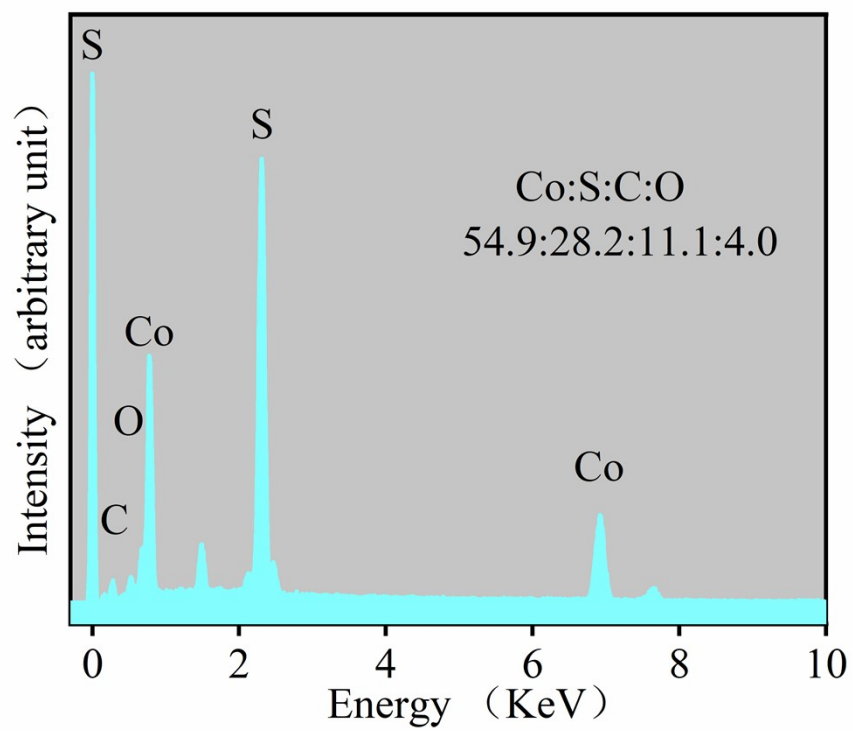

Figure S1 EDS spectra of  $\text{Co}_{1-x}\text{S}$
